# Supplementary material for: FastBLAST: Homology Relationships for Millions of Proteins
Source: PLOS journal article supplement (doi:10.1371/journal.pone.0003589), 2008-10-30
Supplement: S2 (10.1371/journal.pone.0003589.s002) [file journal.pone.0003589.s002]

# Supplementary Text S1: Homology Relations Missed by FastBLAST.

Among our 2,000 test queries, there were four queries for which FastBLAST missed a hit that was within the top 10 hits and over 100 bits. For these four worst misses, we show the Genbank ids (gi #s) for the query and the missed subject, the rank (e.g. 124519843 is the 7th best hit of 71897758 other than itself), the alignment from BLAST, and a brief comment. Apart from the highly repetitive hit, which we suspect is spurious, the earliest rank is #5 and the highest score is 108 bits.

## Query: 71897758, Subject: 124519843, Rank: #7

Clustering fails: subject is clustered with 149199875 (41% identical over a.a. 22-394), but 149199875 is not a BLAST hit of the query.

```
Score = 105 bits (263), Expect = 3e-22, Method: Composition-based stats.
Identities = 61/175 (34%), Positives = 92/175 (52%), Gaps = 4/175 (2%)

Query: 5 QWDSASVADCLVTVPVPTAGTTKVQTRNYKAARRFPVIDQGRNQIAGWTDDEGAVINAP-FP 63
+W+ S +D + +++T Y + ++PV+DQG+ ++ +++DE V P
Sbjct: 220 EWEKVSFSDIFIKTKVK-KHQIKTNEYLESQKYPVVDQGGQKVTAYSNDEEKVFEVPETG 278

Query: 64 LIVFGDHTRAFKFVKRSFARGADGIQLLRPKSGIDPLFFYACRAID-LPARGYNRHFTIL 122
+IVFGDHTR KF+ F GADG Q+L K D F+Y I +P GYNRHF L
Sbjct: 279 LIVFGDHTREIKFIDFDIIGADGTQVLMTKDDYDVRFYHYHLLIQIPNTGYNRHFKFL 338

Query: 123 KEKELTFPRDIDEQAIAEVLRRTEHTLGKQAQILRALHDLKRAMRQLFTCGLR 177
KE P + EQ AI+ +L + L L AL++ K+ M+ L T +R
Sbjct: 339 KEMIFNKP-SLKEQKAISNLLSTIDKELDLLNAELSALNEQKGLMQLLLTGKVR 392
```

## Query: 145475943, Subject: 71407532, Rank: #2

The sequences are highly repetitive. Because the query's repeat has the spacer EGE and the subject's repeat has the spacer STP, the repeats must have expanded independently. The similarity within each repeat is a maximum of only 5 amino acids in a span of 8, so the sequences might not even be homologous. We show only the first of 8 alignments from BLAST for this pair of sequences.

```
Score = 157 bits (397), Expect = 4e-37, Method: Composition-based stats.
Identities = 123/421 (29%), Positives = 126/421 (29%)

Query: 440 SEEHGTTEGEGQSEDHGTQELEGKSEDHGTTEGEGQSEDHGTQELEGKSEDHGTTEGEGQ 499
S HG S HGT S HGT S H T S H T
Sbjct: 690 SSAHGAPSTPADSSAHGTPSTPVDSSAHGTPSTPADSSAHSTPSTPADSSAHSTPSTPAD 749

Query: 500 SEDHGSQELEGKSEDHGTTEGEGQSEDHGTTEGEGKSEDHGTTEGEGQSEDHGTTEGEGQ 559
S H + V S HGT S H T S HGT S H T
Sbjct: 750 SSAHSTPSTPVDSSAHGTPSTPADSSAHSTPSTPADSSAHGTPSTPVDSSAHSTPSTPVD 809

Query: 560 SEDHGTQELEGKSEDHGTTEGEGQSEDHGTQELEGKSEDHGTTEGEGQSEDHGTTEGEGQ 619
S HGT V S H T S HGT S H T S H T
Sbjct: 810 SSAHSTPSTPVDSSAHSTPSTPVDSSAHGTPSTPVDSSAHSTPSTPADSSAHSTPSTPAD 869
```

```

Query: 620 SEDHGTQEGEVKSEDEHGTTEGEGQSEDHGTQEGEVKSEDEHGTTEGEGQSEDHGTQEGEVK 679
      S HGT V S H T S H T V S H T S HGT V
Sbjct: 870 SSAHGTPSTPVDSSAHSTPSTPADSSAHSTPSTPVDSSAHSTPSTPADSSAHGTPSTPVD 929

Query: 680 SDEHGTTEGEGQSEDHGTTEGEGKSEDEHGTTEGEGQSQDHGTTEGEGQSEDHGTQEGEVK 739
      S HGT S H T S H T S H T S H T
Sbjct: 930 SSAHGTPSTPADSSAHSTPSTPADSSAHSTPSTPADSSAHSTPSTPVDSSAHSTPSTPAD 989

Query: 740 SDEHGTTEGEGQSEDHGTTEGEGQSEDHGTTEGEGKSEDEHGTTEGEGQSEDHGTQEGEVK 799
      S H T S H T S H T V S H T S HGT
Sbjct: 990 SSAHSTPSTPADSSAHSTPSTPADSSAHSTPSTPVDSSAHSTPSTPADSSAHGTPSTPAD 1049

Query: 800 SDEHGTTEGEGQSEDHGTQEGEGKAEDHGTTEGEGQSEDHSTSEGEVRSDEHGTNDVKED 859
      S H T S H T + HGT S HST S HGT D
Sbjct: 1050 SSAHSTPSTPVDSSAHSTPSTPADSSAHGTPSTPADSSAHSTPSTPADSSAHGTPSTPAD 1109

Query: 860 T 860
      +
Sbjct: 1110 S 1110

```

**Query: 121612134, Subject: 57237813, Rank: #5**

Although the sequences are nearly identical, and they both map to models 0042501 and 0042480 from SUPERFAMILY, the alignments to those models do not overlap. For example, the query matches model positions 1:148 from 0042501, while the subject matches model positions 252:447, both with E-values of better than  $10^{-17}$ . This problem could perhaps be avoided if HMMer had the option to return secondary high-scoring alignments of the same region to a different portion of the model.

```

Score = 108 bits (271), Expect = 2e-23, Method: Composition-based stats.
Identities = 67/74 (90%), Positives = 67/74 (90%)

Query: 1 MEKSLLFHFRIGVEFIIFSVMVAFSISWAATGSLMPLISNDLALNTQQATLITSMIVVA 60
      MEKSLLFHFRIGVEFIIFSVMVAFSISWAATGSLMPLISNDLALNTQQATLITSMIVVA
Sbjct: 1 MEKSLLFHFRIGVEFIIFSVMVAFSISWAATGSLMPLISNDLALNTQQATLITSMIVVA 60

Query: 61 KIFGASFTAFVYK 74
      KIFGA F K
Sbjct: 61 KIFGAYLGLFFKRR 74

```

**Query: 60418535, Subject: 116510983, Rank: #6**

We would need to look at additional domains to find this homology. The hits to known families for this region of the query are to PF01381.13 (the full-length model of this PFam), PF01381.13.fs (the fragment model of this PFam), and model HTH\_XRE from SMART. FastHMM does not find any hits for these models to the subject (although HMMer would have). The query also has a weaker hit to SUPERFAMILY model 0045230, which hits the subject, but FastBLAST does not consider this domain.

```

Score = 103 bits (258), Expect = 5e-22, Method: Composition-based stats.
Identities = 54/98 (55%), Positives = 68/98 (69%)

Query: 1 MNDLFYHRLKELVEASGKSANQIERELGYPRNSLNYYKLGGEPSGTRLIGLSEYFNVSPK 60
      M ++FY RLK L SGKS NQIERELGY RN+L NYK GG PSG RL+ L+ YF V P
Sbjct: 1 MENIFYRLKALTHEGKSFNQIERELGYTRNALANYKNGVPSGIRLMELANYFKVLPD 60

Query: 61 YLMGIIDEPNDSSAINLFKTLTQEEKKEMFIICQKWL 98
      YL+G + N S N F +LT ++K EM+++CQKW+
Sbjct: 61 YLIGKVPFENVESIENTFVSLTNKQKIEMYLCCQKWIL 98

```
